# Supplementary material for: Clinical Implications of Prominent Cortical Vessels on Susceptibility-Weighted Imaging in Acute Ischemic Stroke Patients Treated with Recanalization Therapy
Source: MDPI journal article supplement (doi:10.3390/brainsci12020184), 2022-01-29
Supplement: s1 [file s1]

## Supplementary materials

Table S1. Clinical and imaging characteristics according to functional outcome at 3 months.

|                                            | Patients, No. (%)         |                           | p-value            |
|--------------------------------------------|---------------------------|---------------------------|--------------------|
|                                            | Good functional outcome   | Poor outcome              |                    |
|                                            | 3-month mRS 0-2<br>(n=36) | 3-month mRS 3-6<br>(n=64) |                    |
| Demographics and clinical characteristics  |                           |                           |                    |
| Age, mean (SD), years                      | 66 (14)                   | 73 (11)                   | 0.03 <sup>a</sup>  |
| Male sex                                   | 23 (63.9)                 | 31 (48.4)                 | 0.14 <sup>b</sup>  |
| Baseline SBP, median (IQR), mmHg           | 140 (130, 150)            | 144 (130, 164)            | 0.25 <sup>c</sup>  |
| Baseline glucose level, median (IQR) mg/dl | 116 (106, 142)            | 139 (119, 172)            | <0.01 <sup>c</sup> |
| Baseline NIHSS score, median (IQR)         | 13 (9, 17)                | 16 (14, 19)               | <0.01 <sup>c</sup> |
| Pre-stroke mRS                             |                           |                           | 0.07 <sup>d</sup>  |
| 0                                          | 35 (97.2)                 | 55 (85.9)                 |                    |
| 1                                          | 1 (2.8)                   | 7 (10.9)                  |                    |
| 2                                          | 0                         | 2 (3.1)                   |                    |
| TOAST classification                       |                           |                           | 0.22 <sup>d</sup>  |
| Large artery atherosclerosis               | 10 (27.8)                 | 9 (14.1)                  |                    |
| Cardioembolism                             | 20 (55.6)                 | 43 (67.2)                 |                    |
| Other determined or undetermined           | 6 (16.7)                  | 12 (18.8)                 |                    |
| History of stroke                          | 3 (8.3)                   | 17 (26.6)                 | 0.04 <sup>e</sup>  |
| Hypertension                               | 18 (50.0)                 | 52 (81.3)                 | <0.01 <sup>b</sup> |
| Diabetes mellitus                          | 6 (16.7)                  | 18 (28.1)                 | 0.20 <sup>b</sup>  |
| Dyslipidemia                               | 5 (13.9)                  | 9 (14.1)                  | 0.98 <sup>b</sup>  |

|                                       |           |           |                    |
|---------------------------------------|-----------|-----------|--------------------|
| Atrial fibrillation                   | 18 (50.0) | 39 (60.9) | 0.29 <sup>b</sup>  |
| Current smoker                        | 9 (25.0)  | 13 (20.3) | 0.59 <sup>b</sup>  |
| Pre-stroke medication                 |           |           |                    |
| Antiplatelet or anticoagulants agents | 10 (27.8) | 31 (48.4) | 0.04 <sup>b</sup>  |
| Statin                                | 4 (11.1)  | 13 (20.3) | 0.28 <sup>e</sup>  |
| Reperfusion therapy type              |           |           | 0.61 <sup>d</sup>  |
| IV thrombolysis                       | 7 (19.4)  | 3 (4.7)   |                    |
| Endovascular treatment                | 6 (16.7)  | 25 (39.1) |                    |
| Combined therapy                      | 23 (63.9) | 36 (56.3) |                    |
| Site of occlusion                     |           |           | 0.01 <sup>d</sup>  |
| Middle cerebral artery                |           |           |                    |
| M1                                    | 29 (80.6) | 30 (46.9) |                    |
| M2                                    | 1 (2.8)   | 3 (4.7)   |                    |
| Internal carotid artery               | 6 (16.7)  | 31 (48.4) |                    |
| ASPECTS-SWI, median (IQR)             | 8 (6, 9)  | 5 (3, 7)  | <0.01 <sup>c</sup> |
| PCV-SWI (ASPECT-SWI, 0-7)             | 17 (25.4) | 50 (74.6) | <0.01 <sup>b</sup> |
| Collateral score-mCTA, median (IQR)   | 4 (3, 4)  | 3 (2, 4)  | <0.01 <sup>c</sup> |
| Good collateral status (CC-mCTA, 4-5) | 22 (61.1) | 22 (34.4) | 0.01 <sup>b</sup>  |
| Successful recanalization             | 30 (83.3) | 33 (51.6) | <0.01 <sup>b</sup> |
| Any intracerebral hemorrhage          | 5 (13.9)  | 22 (34.4) | 0.03 <sup>b</sup>  |

Abbreviations: SD, standard deviation; IQR, interquartile range; mRS, modified Rankin scale; NIHSS, National Institute of Health Stroke Scale; TOAST, Trial of ORG 10172 in Acute Stroke Treatment; LAA, large artery atherosclerosis; CE, cardioembolism; OE, other etiology; mCTA, multiphase CTA; ASPECTS, Alberta Stroke Program Early CT Score; eTICI, expanded Thrombolysis in Cerebral Infarction; mRS, modified Rankin Scale

<sup>a</sup> p-value by student's t test

<sup>b</sup> p-value by chi-square test

<sup>c</sup> p-value by Mann-Whitney U test

<sup>d</sup> p-value by Cochran-Mantel-Haenszel shift test

<sup>e</sup> p-value by Fisher's exact test

Table S2. Clinical and imaging characteristics according to successful recanalization (eTICI 2b-3).

|                                            | Patients, No. (%) |                | p-value           |
|--------------------------------------------|-------------------|----------------|-------------------|
|                                            | eTICI 2b-3        | eTICI 0-2a     |                   |
|                                            | (n=62)            | (n=38)         |                   |
| Demographics and clinical characteristics  |                   |                |                   |
| Age, mean (SD), years                      | 70 (13)           | 70 (13)        | 0.85 <sup>a</sup> |
| Male sex                                   | 34 (54.0)         | 20 (54.1)      | 0.99 <sup>b</sup> |
| Baseline SBP, median (IQR), mmHg           | 140 (130, 160)    | 140 (130, 160) | 0.93 <sup>c</sup> |
| Baseline glucose level, median (IQR) mg/dl | 129 (111, 155)    | 131 (119, 180) | 0.18 <sup>c</sup> |
| Baseline NIHSS score, median (IQR)         | 16 (12, 18)       | 15 (11, 19)    | 0.85 <sup>c</sup> |
| Pre-stroke mRS                             |                   |                | 0.19 <sup>d</sup> |
| 0                                          | 56 (87.3)         | 35 (94.6)      |                   |
| 1                                          | 6 (9.5)           | 2 (9.5)        |                   |
| 2                                          | 2 (3.2)           | 0              |                   |
| TOAST classification                       |                   |                | 0.58 <sup>d</sup> |
| Large artery atherosclerosis               | 9 (14.3)          | 10 (27.0)      |                   |
| Cardioembolism                             | 44 (69.8)         | 19 (51.4)      |                   |
| Other determined or undetermined           | 10 (15.9)         | 8 (21.6)       |                   |
| History of stroke                          | 18 (28.6)         | 2 (5.4)        | 0.01 <sup>e</sup> |

|                                       |           |           |                    |
|---------------------------------------|-----------|-----------|--------------------|
| Hypertension                          | 42 (66.7) | 28 (75.7) | 0.34 <sup>b</sup>  |
| Diabetes mellitus                     | 16 (25.4) | 8 (21.6)  | 0.67 <sup>b</sup>  |
| Dyslipidemia                          | 9 (14.3)  | 5 (13.5)  | 0.91 <sup>b</sup>  |
| Atrial fibrillation                   | 39 (61.9) | 18 (48.6) | 0.19 <sup>b</sup>  |
| Current smoker                        | 15 (23.8) | 7 (18.9)  | 0.57 <sup>b</sup>  |
| Pre-stroke medication                 |           |           |                    |
| Antiplatelet or anticoagulants agents | 28 (44.4) | 13 (35.1) | 0.36 <sup>b</sup>  |
| Statin                                | 13 (20.6) | 4 (10.8)  | 0.28 <sup>e</sup>  |
| Reperfusion therapy type              |           |           | 0.95 <sup>d</sup>  |
| IV thrombolysis                       | 9 (14.3)  | 6 (16.2)  |                    |
| Endovascular treatment                | 20 (31.7) | 10 (27.0) |                    |
| Combined therapy                      | 34 (54.0) | 21 (56.8) |                    |
| Site of occlusion                     |           |           | 0.16 <sup>d</sup>  |
| Middle cerebral artery                |           |           |                    |
| M1                                    | 38 (60.3) | 21 (56.8) |                    |
| M2                                    | 4 (6.3)   | 0         |                    |
| Internal carotid artery               | 21 (33.3) | 16 (43.2) |                    |
| ASPECTS-SWI, median (IQR)             | 7 (4, 8)  | 5 (4, 7)  | <0.01 <sup>c</sup> |
| PCV-SWI (ASPECT-SWI, 0-7)             | 36 (58.1) | 31 (81.6) | 0.02 <sup>c</sup>  |
| Collateral score-mCTA, median (IQR)   | 3 (3, 4)  | 3 (2, 4)  | 0.06 <sup>b</sup>  |
| Good collateral status (CC-mCTA, 4-5) | 30 (47.6) | 14 (37.8) | 0.34 <sup>b</sup>  |

Abbreviations: eTICI, expanded Thrombolysis in Cerebral Infarction; SD, standard deviation; IQR, interquartile range; mRS, modified Rankin scale; NIHSS, National Institute of Health Stroke Scale; TOAST, Trial of ORG 10172 in Acute Stroke Treatment; LAA, large artery atherosclerosis; CE, cardioembolism; OE,

other etiology; mCTA, multiphase CTA; mRS, modified Rankin Scale; ASPECTS, Alberta Stroke Program Early CT Score; PCV-SWI, prominent cortical vessel-susceptibility weighted image; CC-mCTA, collateral status score-multiphase CT angiography

<sup>a</sup> p-value by student's t test

<sup>b</sup> p-value by chi-square test

<sup>c</sup> p-value by Mann-Whitney U test

<sup>d</sup> p-value by Cochran-Mantel-Haenszel shift test

<sup>e</sup> p-value by Fisher's exact test

Table S3. The factors associated with successful recanalization (eTICI 2b or 3) using logistic regression analyses.

|                   | Unadjusted OR     |         | Adjusted OR        |         |
|-------------------|-------------------|---------|--------------------|---------|
|                   | OR (95% CI)       | p-value | OR (95% CI)        | p-value |
| Age               | 1.00 (0.97, 1.04) | 0.85    | 1.01 (0.98, 1.05)  | 0.48    |
| Sex (male)        | 0.99 (0.44, 2.25) | 0.99    | 1.04 (0.41, 2.63)  | 0.94    |
| History of stroke | 7.00 (1.52, 32.2) | 0.01    | 5.95 (1.53, 23.09) | 0.01    |
| PCV-SWI           | 0.31 (0.12, 0.82) | 0.02    | 0.23 (0.08, 0.65)  | <0.01   |

Abbreviations: OR, odds ratio; CI, confidence interval; NIHSS, National Institute of Health Stroke Scale; PCV-SWI, prominent cortical vessel- susceptibility weighted image

Adjusted for age, sex, history of prior stroke, and prominent cortical vessels (PCV-SWI 0-2)

Table S4. Clinical and imaging characteristics according to any intracerebral hemorrhage.

|                                            | Patients, No. (%)  |                    | p-value           |
|--------------------------------------------|--------------------|--------------------|-------------------|
|                                            | Any ICH (+) (n=27) | Any ICH (-) (n=73) |                   |
| Demographics and clinical characteristics  |                    |                    |                   |
| Age, mean (SD), years                      | 69.4 (11.9)        | 70.4 (13.2)        | 0.74 <sup>a</sup> |
| Male sex                                   | 15 (55.6)          | 39 (53.4)          | 0.85 <sup>b</sup> |
| Baseline SBP, median (IQR), mmHg           | 140 (137, 170)     | 140 (130, 158)     | 0.53 <sup>c</sup> |
| Baseline glucose level, median (IQR) mg/dl | 147(120, 173)      | 124 (110, 153)     | 0.02 <sup>c</sup> |
| Baseline NIHSS score, median (IQR)         | 16 (14, 18)        | 15 (11, 18)        | 0.29 <sup>c</sup> |
| Pre-stroke mRS                             |                    |                    | 0.66 <sup>d</sup> |
| 0                                          | 24 (88.9)          | 66 (90.4)          |                   |
| 1                                          | 2 (7.4)            | 6(8.2)             |                   |
| 2                                          | 1 (3.7)            | 1 (1.4)            |                   |
| TOAST classification                       |                    |                    | 0.12 <sup>d</sup> |
| Large artery atherosclerosis               | 1 (3.7)            | 18 (24.7)          |                   |
| Cardioembolism                             | 21 (77.8)          | 42 (57.5)          |                   |
| Other determined or undetermined           | 5 (18.5)           | 13 (17.8)          |                   |
| Stroke history                             | 8 (29.6)           | 12 (16.4)          | 0.14 <sup>b</sup> |
| Hypertension                               | 21 (77.8)          | 49 (67.1)          | 0.30 <sup>b</sup> |
| Diabetes mellitus                          | 10 (37.0)          | 14 (28.1)          | 0.06 <sup>b</sup> |
| Dyslipidemia                               | 5 (18.5)           | 9 (12.3)           | 0.43 <sup>b</sup> |
| Atrial fibrillation                        | 19 (70.4)          | 38 (52.1)          | 0.10 <sup>b</sup> |
| Current smoker                             | 6 (22.2)           | 16 (21.9)          | 0.97 <sup>b</sup> |
| Pre-stroke medication                      |                    |                    |                   |

|                                       |           |           |                   |
|---------------------------------------|-----------|-----------|-------------------|
| Antiplatelet or anticoagulants agents | 14 (51.9) | 27 (37.0) | 0.18 <sup>b</sup> |
| Statin                                | 4 (14.8)  | 13 (17.8) | 1.00 <sup>e</sup> |
| Reperfusion therapy type              |           |           | 0.50 <sup>d</sup> |
| IV thrombolysis                       | 1 (3.7)   | 14 (19.2) |                   |
| Endovascular treatment                | 12 (44.4) | 18 (24.7) |                   |
| Combined therapy                      | 14 (51.9) | 41 (56.2) |                   |
| Site of occlusion                     |           |           | 0.66 <sup>d</sup> |
| Middle cerebral artery                |           |           |                   |
| M1                                    | 1 (3.7)   | 3 (4.1)   |                   |
| M2                                    | 15 (55.6) | 44 (60.3) |                   |
| Internal carotid artery               | 11 (40.7) | 26 (35.6) |                   |
| ASPECTS-SWI, median (IQR)             | 5 (2, 8)  | 6 (4, 8)  | 0.26 <sup>c</sup> |
| PCV-SWI (ASPECT-SWI, 0-7)             | 19 (70.4) | 48 (65.8) | 0.66 <sup>b</sup> |
| Collateral score-mCTA, median (IQR)   | 3 (2, 4)  | 3 (2, 4)  | 0.50 <sup>c</sup> |
| Good collateral status (CC-mCTA, 4-5) | 10 (37.0) | 34 (46.6) | 0.39 <sup>b</sup> |

Abbreviations: ICH, intracerebral hemorrhage; SD, standard deviation; IQR, interquartile range; mRS, modified Rankin scale; NIHSS, National Institute of Health Stroke Scale; TOAST, Trial of ORG 10172 in Acute Stroke Treatment; LAA, large artery atherosclerosis; CE, cardioembolism; OE, other etiology; ASPECTS, Alberta Stroke Program Early CT Score; mCTA, multiphase CTA; eTICI, expanded Thrombolysis in Cerebral Infarction; mRS, modified Rankin Scale

<sup>a</sup> p-value by student's t test

<sup>b</sup> p-value by chi-square test

<sup>c</sup> p-value by Mann-Whitney U test

<sup>d</sup> p-value by Cochran-Mantel-Haenszel shift test

<sup>e</sup> p-value by Fisher's exact test

Table S5. The factors associated with any intracerebral hemorrhage using logistic regression analyses.

|                              | Unadjusted OR     |         | Adjusted OR       |         |
|------------------------------|-------------------|---------|-------------------|---------|
|                              | OR (95% CI)       | p-value | OR (95% CI)       | p-value |
| Age                          | 0.99 (0.96, 1.03) | 0.85    | 0.99 (0.96, 1.03) | 0.77    |
| Sex (male)                   | 1.09 (0.45, 2.65) | 0.14    | 1.11 (0.43, 2.90) | 0.83    |
| Initial glucose level, mg/dl | 1.01 (0.99, 1.01) | 0.21    | 1.01 (0.99, 1.02) | 0.21    |
| PCV-SWI                      | 1.24 (0.48, 3.22) | 0.66    | 1.33 (0.50, 3.55) | 0.57    |

Abbreviations: OR, odds ratio; CI, confidence interval; NIHSS, National Institute of Health Stroke Scale; PCV-SWI, prominent cortical vessel- susceptibility weighted image

Adjusted for age, sex, glucose level at admission, and prominent cortical vessels (PCV-SWI 0-2)

Table S6. Predictive ability of each imaging modality to discriminate outcomes in patients with endovascular treatment using multivariable logistic regression analysis, receiver operating curve analysis, AIC, and BIC.

|                                                        | Imaging modality                        | Adjusted OR (95% CI) | p-value | C statistic | AIC  | BIC |
|--------------------------------------------------------|-----------------------------------------|----------------------|---------|-------------|------|-----|
| Good functional outcome (3-month mRS 0-2) <sup>a</sup> | ASPECT-SWI (0-10), increase per 1 score | 1.46 (1.13, 1.89)    | <0.01   | 0.89        | 83.4 | 105 |
|                                                        | PCV-SWI ( $\leq 7$ versus $> 7$ )       | 0.24 (0.06, 0.87)    | 0.03    | 0.86        | 88.9 | 111 |
|                                                        | CC-mCTA (0-5), increase per 1 score     | 2.07 (1.18, 3.63)    | 0.01    | 0.88        | 85.9 | 108 |
|                                                        | Good CC-mCTA ( $\geq 4$ versus $< 4$ )  | 1.52 (0.47, 4.98)    | 0.49    | 0.80        | 93.4 | 115 |
| Successful recanalization (eTICI 2b-3) <sup>c</sup>    | ASPECT-SWI (0-10), increase per 1 score | 1.30 (1.09, 1.55)    | <0.01   | 0.70        | 113  | 125 |
|                                                        | PCV-SWI ( $\leq 7$ versus $> 7$ )       | 0.18 (0.05, 0.59)    | <0.01   | 0.70        | 112  | 124 |
|                                                        | CC-mCTA (0-5), increase per 1 score     | 1.52 (1.03, 2.23)    | 0.04    | 0.71        | 110  | 122 |
|                                                        | Good CC-mCTA ( $\geq 4$ versus $< 4$ )  | 1.64 (0.62, 4.38)    | 0.32    | 0.66        | 114  | 126 |



|                                              |                                         |                   |      |      |     |     |
|----------------------------------------------|-----------------------------------------|-------------------|------|------|-----|-----|
| Any intracerebral<br>hemorrhage <sup>d</sup> | ASPECT-SWI (0-10), increase per 1 score | 0.97 (0.82, 1.15) | 0.69 | 0.66 | 112 | 124 |
|                                              | PCV-SWI ( $\leq 7$ versus $> 7$ )       | 1.08 (0.39, 3.01) | 0.89 | 0.67 | 112 | 124 |
|                                              | CC-mCTA (0-5), increase per 1 score     | 1.05 (0.71, 1.55) | 0.82 | 0.68 | 112 | 124 |
|                                              | Good CC-mCTA ( $\geq 4$ versus $< 4$ )  | 0.92 (0.33, 2.55) | 0.88 | 0.67 | 112 | 124 |

Abbreviations: OR, odds ratio; CI, confidence interval; AIC, Akaike information criterion; BIC, Bayesian information criterion; mRS, modified Rankin scale; NIHSS, National Institute of Health Stroke Scale; PCV-SWI, prominent cortical vessel- susceptibility weighted image; CC-mCTA, collateral status score- multiphase CT angiography

<sup>a</sup>. Adjusted for age, sex, baseline NIHSS score, baseline glucose level, history of hypertension, history of stroke, prior antiplatelet or anticoagulant use, and each imaging modality

<sup>b</sup>. Adjusted for age, sex, history of hypertension, and each imaging modality

<sup>c</sup>. Adjusted for age, sex, admission glucose level, and each imaging modality

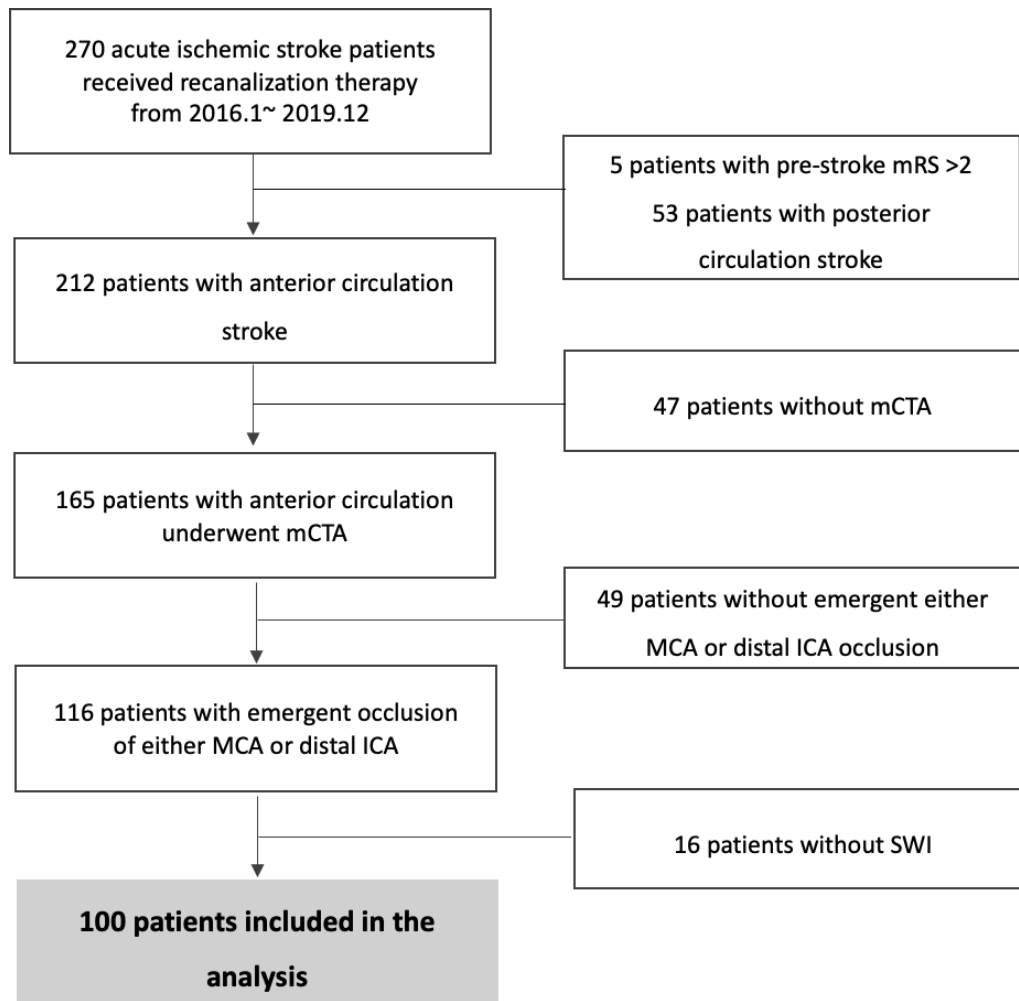

Figure S1 Study population

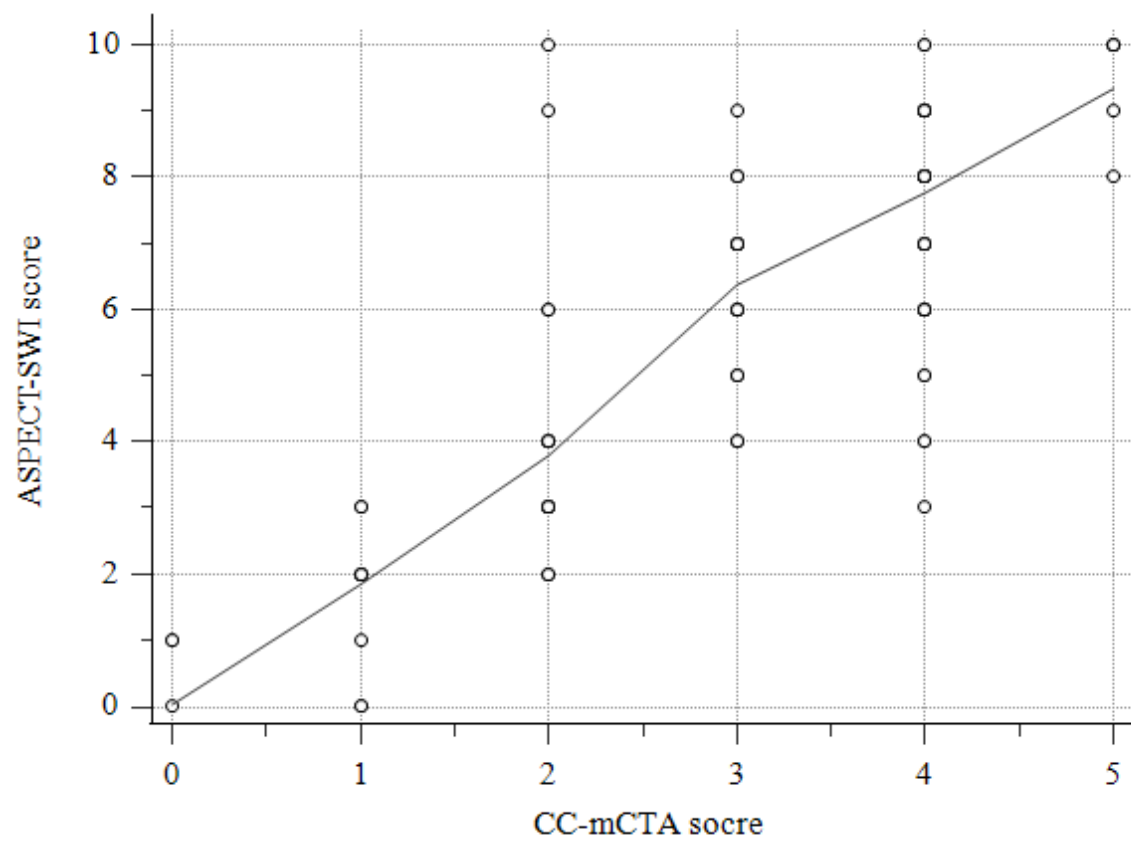

Figure S2. catter plot of the correlation between the prominent cortical vessels on SWI (PCV-SWI) and collateral status on multiphase CT angiography (CC-mCTA).

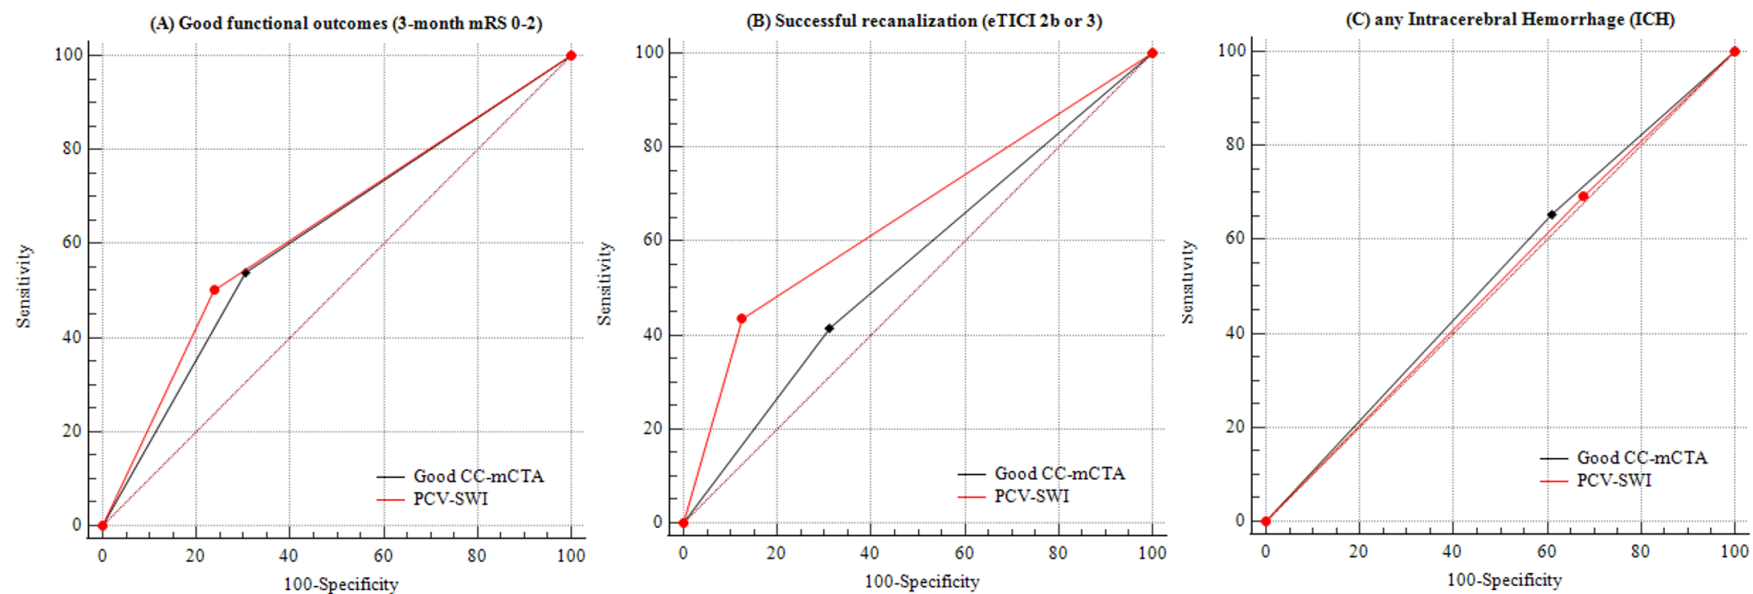

Figure S3. Comparison of AUCs between PCV-SWI and good CC-mCTA in patients with endovascular therapy.
